# Supplementary material
Source: publisher figshare collection journal article supplement (https://acs.figshare.com/ndownloader/files/5214835)
Supplement: Supplementary file 1 [file 5214835]

Supporting information S3

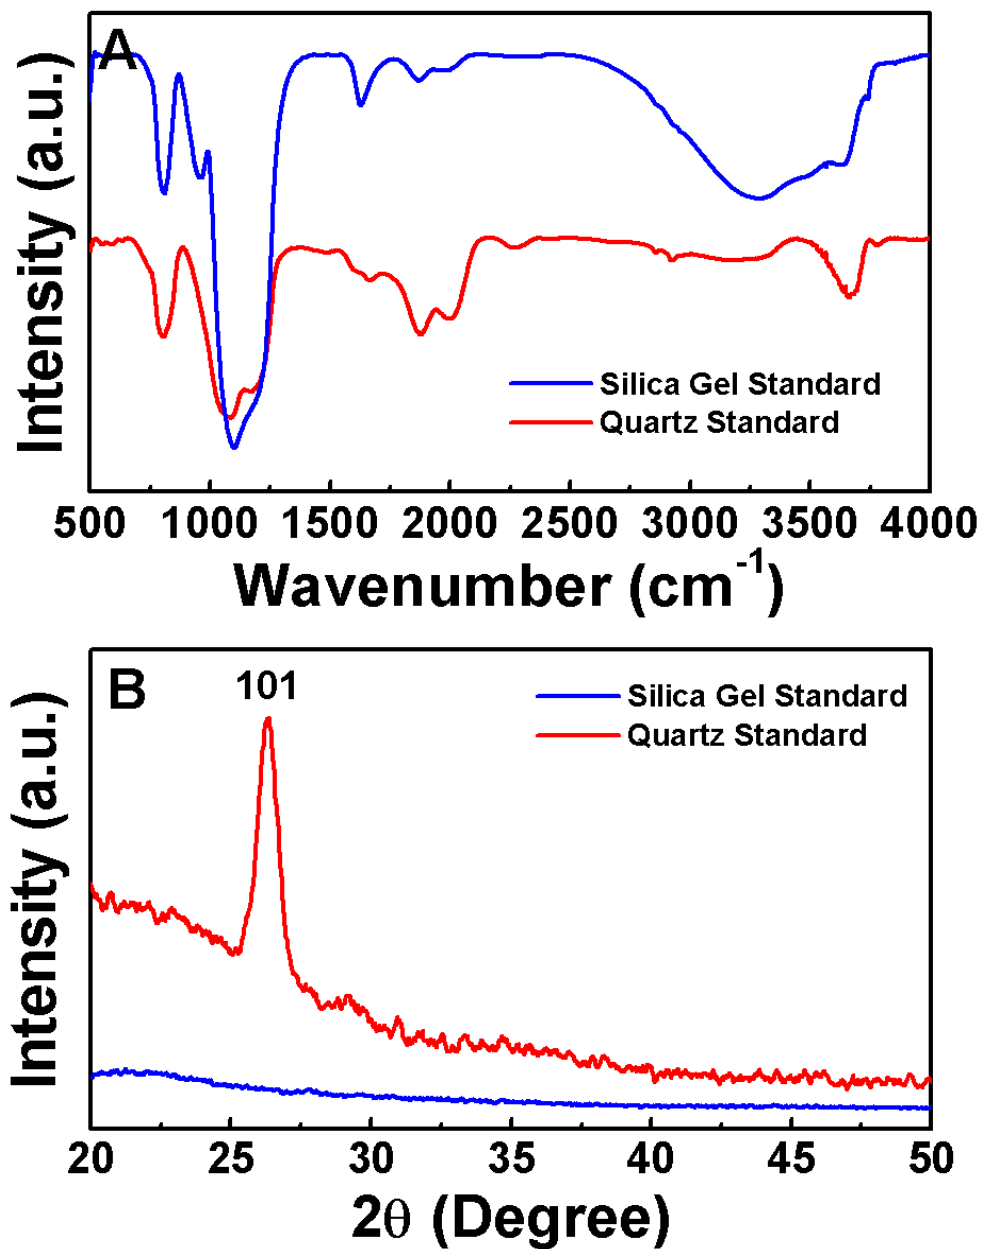

S3. A) FTIR spectra recorded from standard silica gel and quartz particles; B) XRD patterns recorded from standard silica gel and quartz particles.
